# Supplementary material
Source: publisher figshare collection journal article supplement (https://karger.figshare.com/articles/dataset/_/28683008)

**Supplementary figure 3.** Funnel plot for publication bias related to the association between mGPS and cancer-specific survival

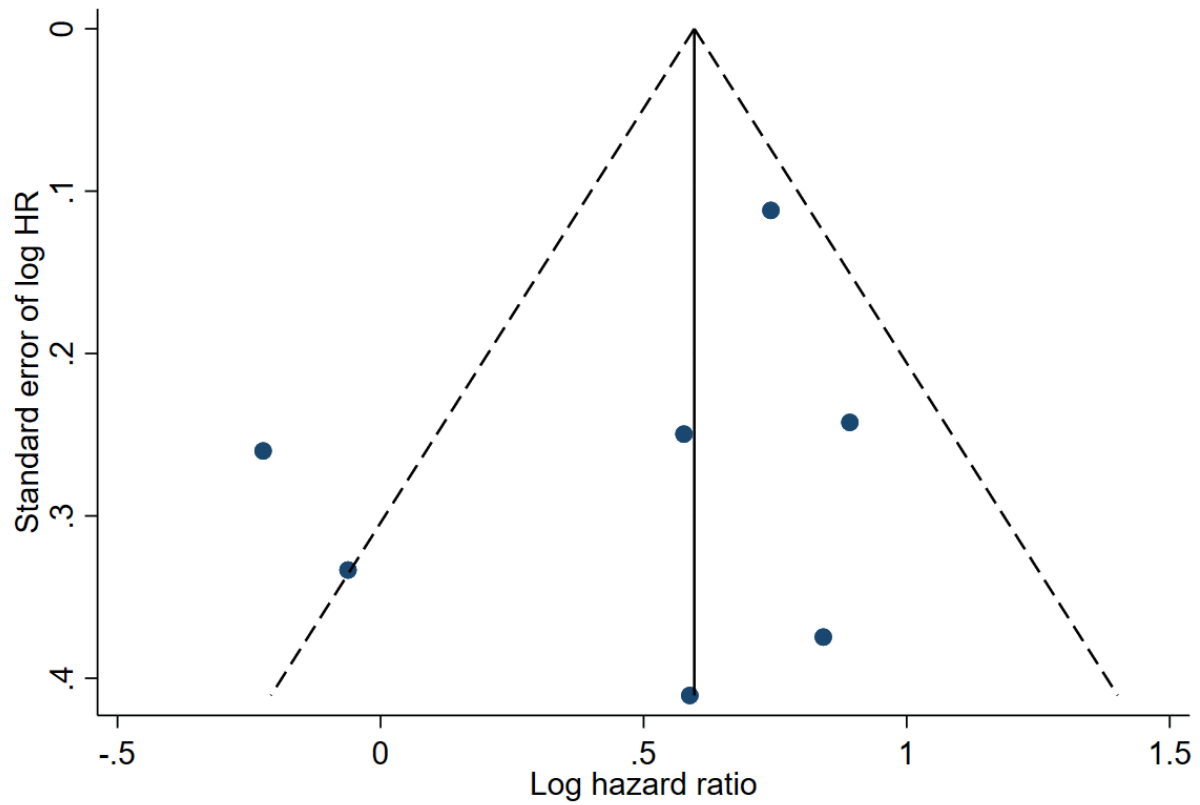

Supplement: Supplementary file 2 [file 1]
