# Supplementary material
Source: publisher figshare collection journal article supplement (https://karger.figshare.com/articles/dataset/_/28683008)

**Supplementary figure 2.** Forest plot for the association between mGPS as a “continuous” exposure and overall survival, in subjects with prostate cancer

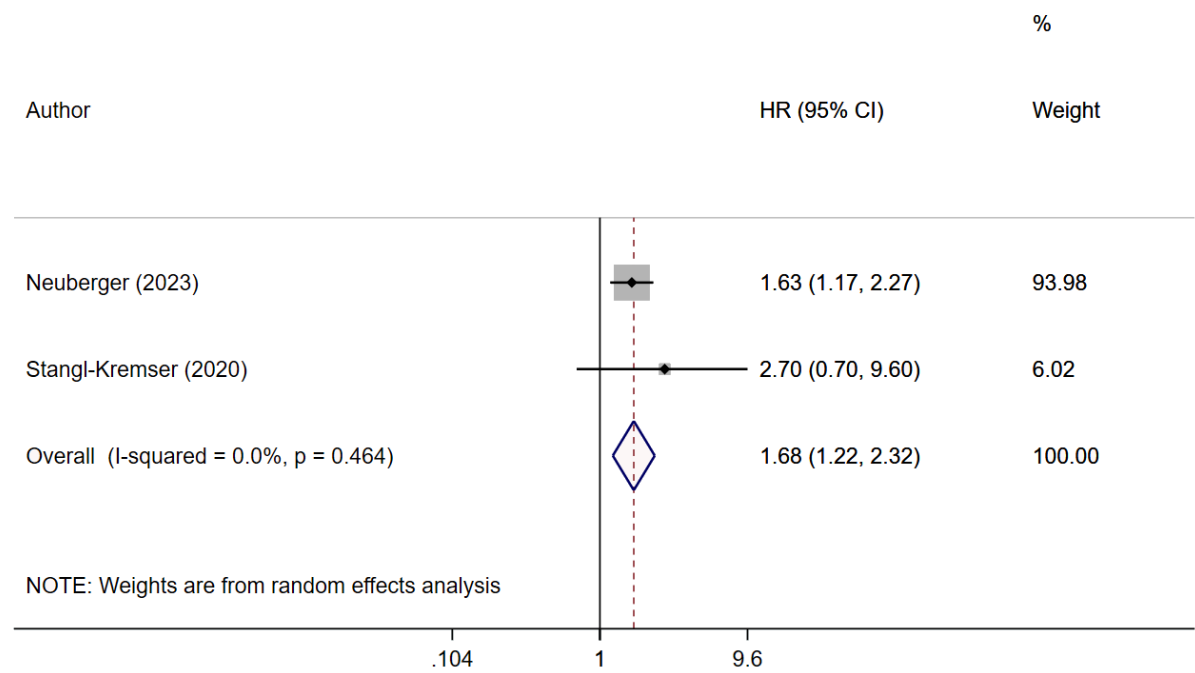

Supplement: Supplementary file 3 [file 1]
